# Supplementary material for: Shiga toxin binding alters lipid packing and the domain structure of Gb3-containing membranes: a solid-state NMR study
Source: Royal Society of Chemistry journal article supplement (doi:10.1039/c9cp02501d), 2019-01-01
Supplement: c9cp02501d1.pdf [file c9cp02501d1.pdf]

**Shiga Toxin Binding Alters Lipid Packing and Domain Structure of Gb<sub>3</sub>-Containing Membranes: A  
Solid-State NMR Study**

Mathias Bosse,<sup>a</sup> Jeremias Sibold,<sup>b</sup> Holger A. Scheidt,<sup>a</sup> Lukas J. Patalag,<sup>c</sup> Katharina Kettelhoit,<sup>c</sup> Annika  
Ries,<sup>c</sup> Daniel B. Werz,<sup>c</sup> Claudia Steinem,<sup>bd</sup> and Daniel Huster<sup>\*a</sup>

<sup>a</sup> Institute for Medical Physics and Biophysics, Leipzig University, Härtelstr. 16-18, D-04107 Leipzig,  
Germany

<sup>b</sup> Institute for Organic and Biomolecular Chemistry, University of Göttingen, Tammannstr. 2, D-37077  
Göttingen, Germany

<sup>c</sup> Technische Universität Braunschweig, Institute of Organic Chemistry, Hagenring 30, D-38106  
Braunschweig, Germany

<sup>d</sup> Max-Planck-Institute for Dynamics and Self-Organization, Am Fassberg 11, 37077 Göttingen,  
Germany

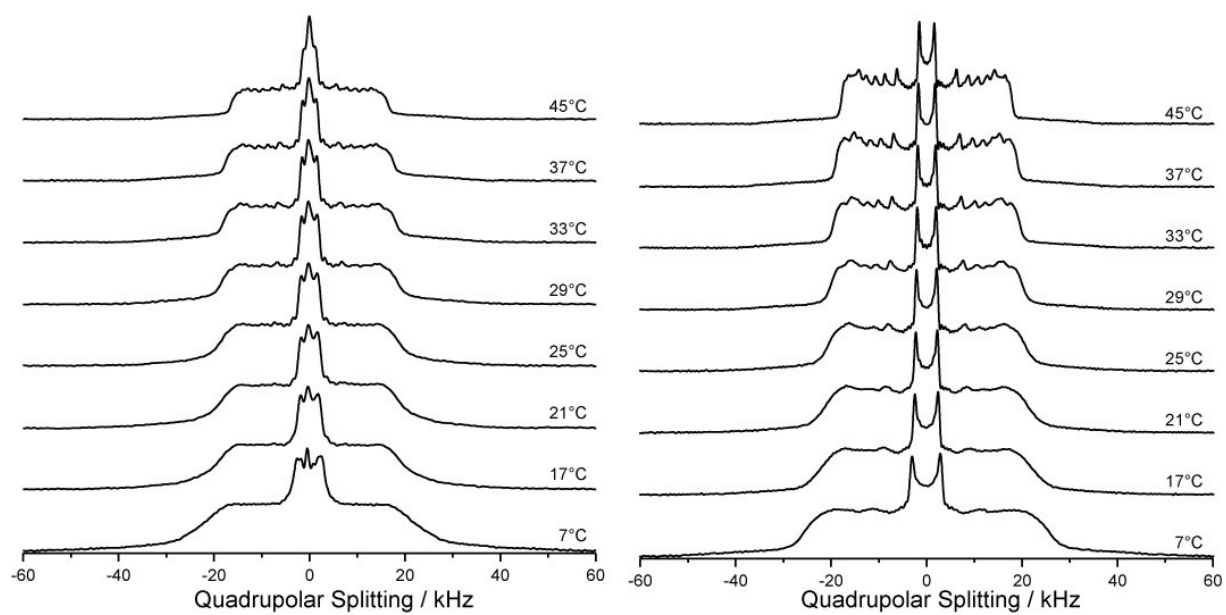

**Supplementary Figure S1.**  $^2\text{H}$  NMR spectra for the deuterated POPC- $d_{31}$  of the quaternary lipid mixture lignoceryl-Gb<sub>3</sub>/POPC- $d_{31}$ /PSM/cholesterol (molar ratio: 5:40:35:20) in the presence of STxB (molar protein to lipid ratio of 1:120, left) and in the absence of STxB (right) at the given temperatures.

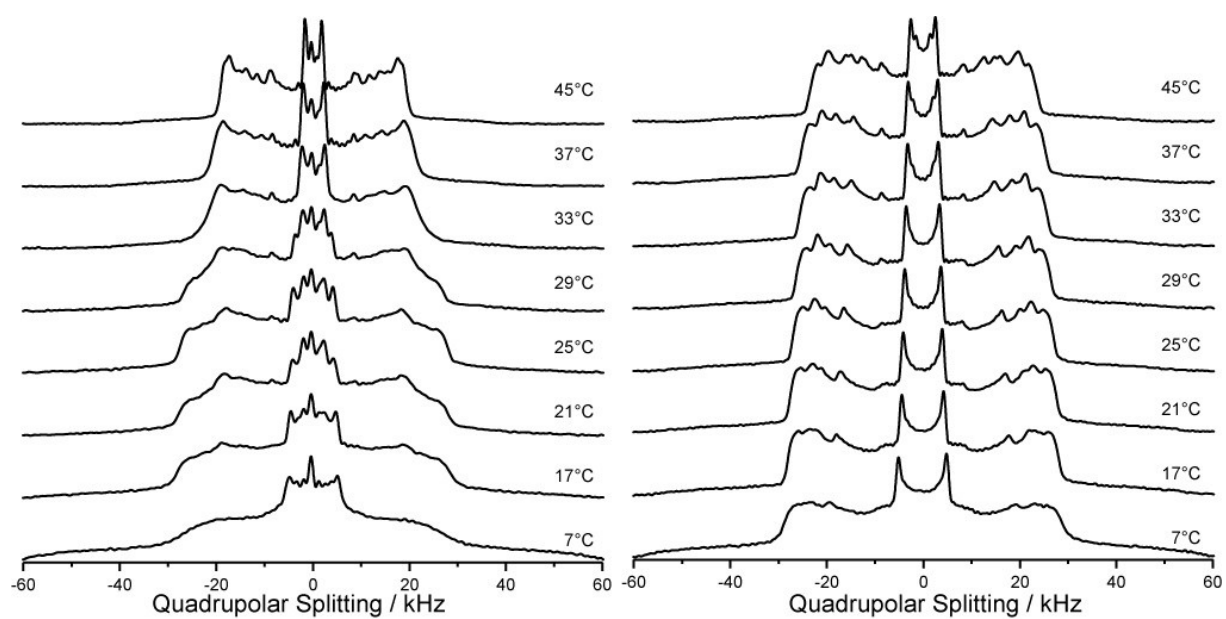

**Supplementary Figure S2.**  $^2\text{H}$  NMR spectra for the deuterated PSM- $d_{31}$  of the quaternary lipid mixture lignoceryl-Gb<sub>3</sub>/POPC/PSM- $d_{31}$ /cholesterol (molar ratio: 5:40:35:20) in the presence of STxB (molar protein to lipid ratio of 1:120, left) and in the absence of STxB (right) at the given temperatures.

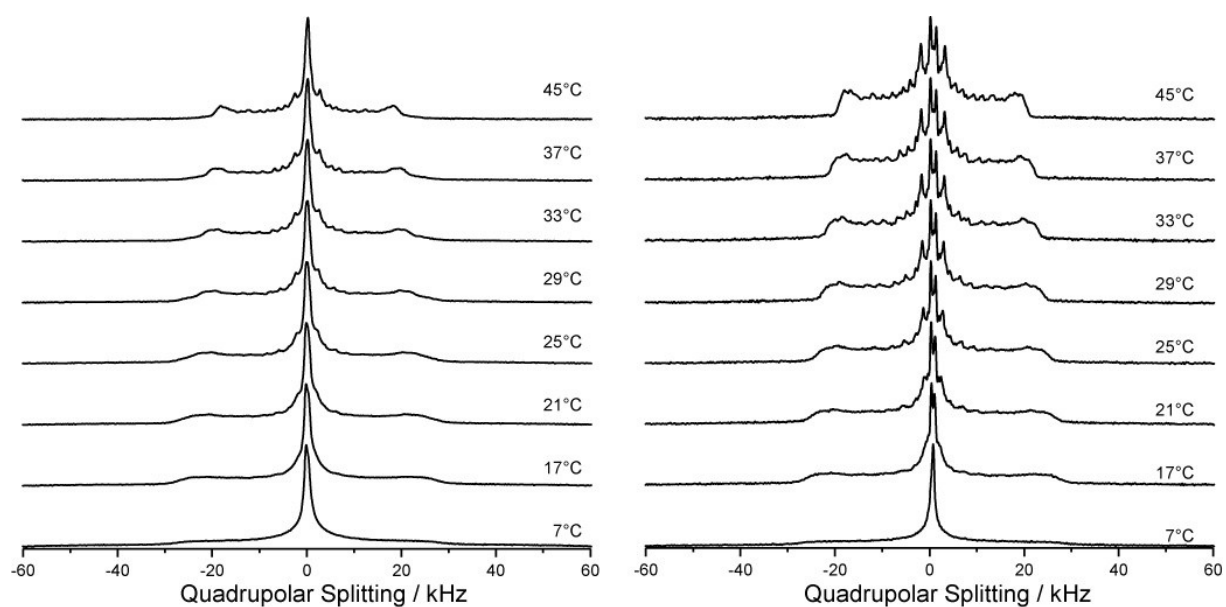

**Supplementary Figure S3.**  $^2\text{H}$  NMR spectra for the deuterated lignoceryl- $\text{Gb}_3\text{-}d_{47}$  of the quaternary lipid mixture lignoceryl- $\text{Gb}_3\text{-}d_{47}$ /POPC/PSM /cholesterol (molar ratio: 5:40:35:20) in the presence of STxB (molar protein to lipid ratio of 1:120, left) and in the absence of STxB (right) at the given temperatures.

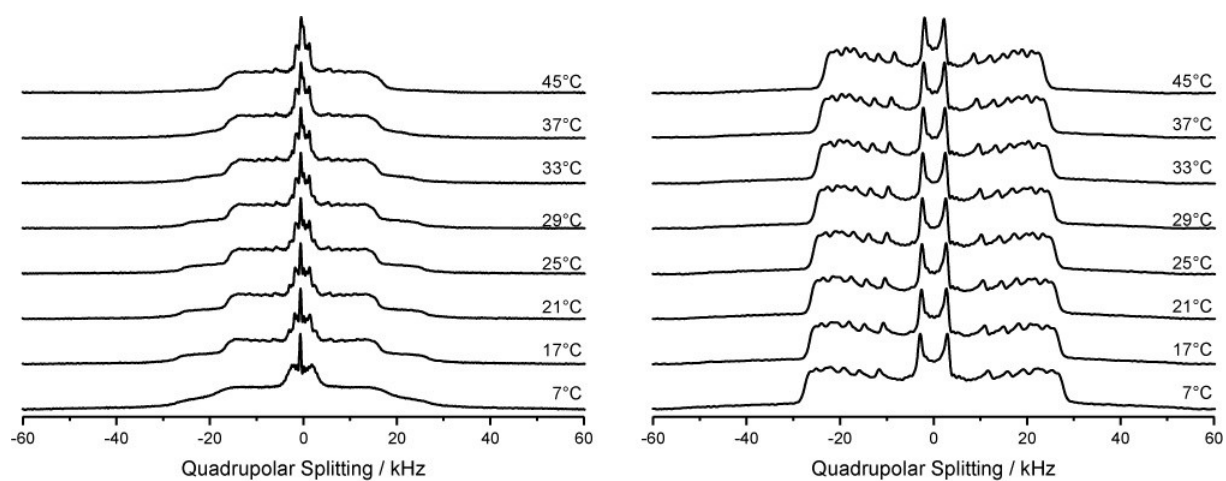

**Supplementary Figure S4.**  $^2\text{H}$  NMR spectra for the deuterated POPC- $d_{31}$  of the quaternary lipid mixture palmitoyl-Gb<sub>3</sub>/POPC- $d_{31}$ /PSM/cholesterol (molar ratio: 5:40:35:20) in the presence of STxB (molar protein to lipid ratio of 1:120, left) and in the absence of STxB (right) at the given temperatures.

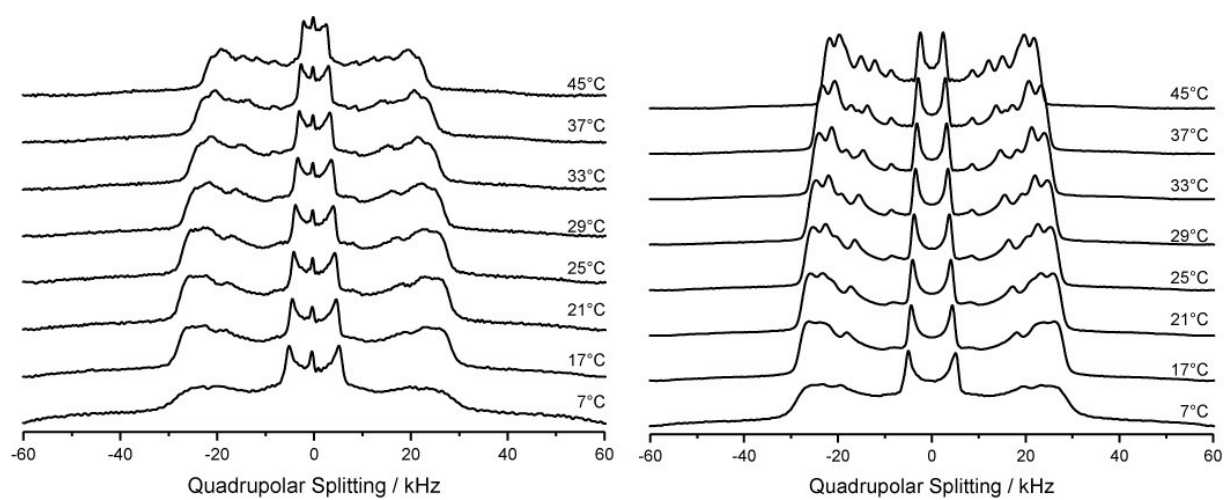

**Supplementary Figure S5.**  $^2\text{H}$  NMR spectra for the deuterated PSM- $d_{31}$  of the quaternary lipid mixture palmitoyl-Gb<sub>3</sub>/POPC/PSM- $d_{31}$ /cholesterol (molar ratio: 5:40:35:20) in the presence of STxB (molar protein to lipid ratio of 1:120, left) and in the absence of STxB (right) at the given temperatures.

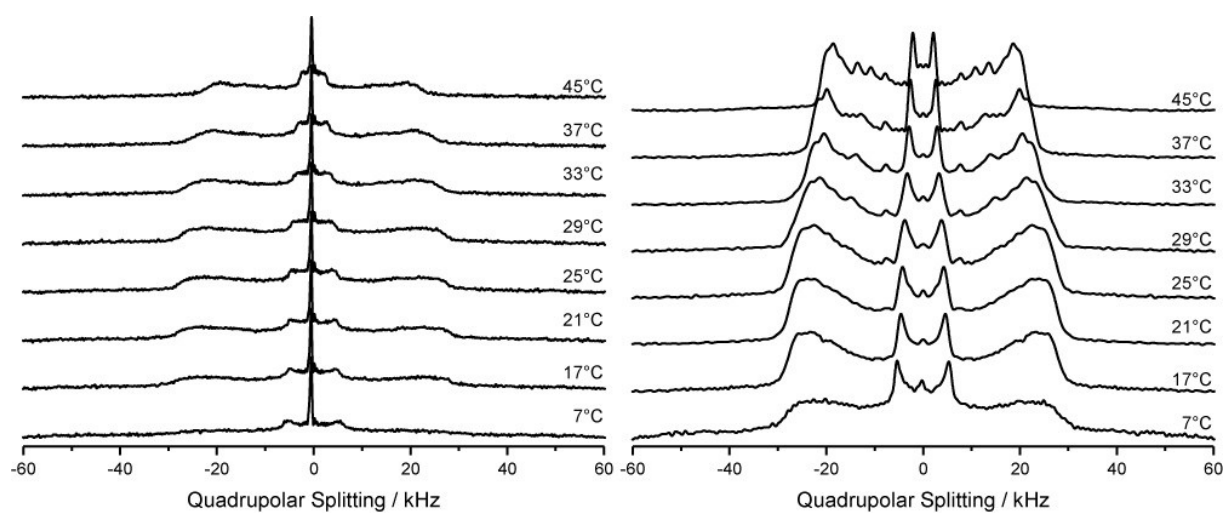

**Supplementary Figure S6.**  $^2\text{H}$  NMR spectra for the deuterated palmitoyl- $\text{Gb}_3\text{-}d_{31}$  of the quaternary lipid mixture palmitoyl- $\text{Gb}_3\text{-}d_{31}$ /POPC/PSM/cholesterol (molar ratio: 5:40:35:20) in the presence of STxB (molar protein to lipid ratio of 1:120, left) and in the absence of STxB (right) at the given temperatures.

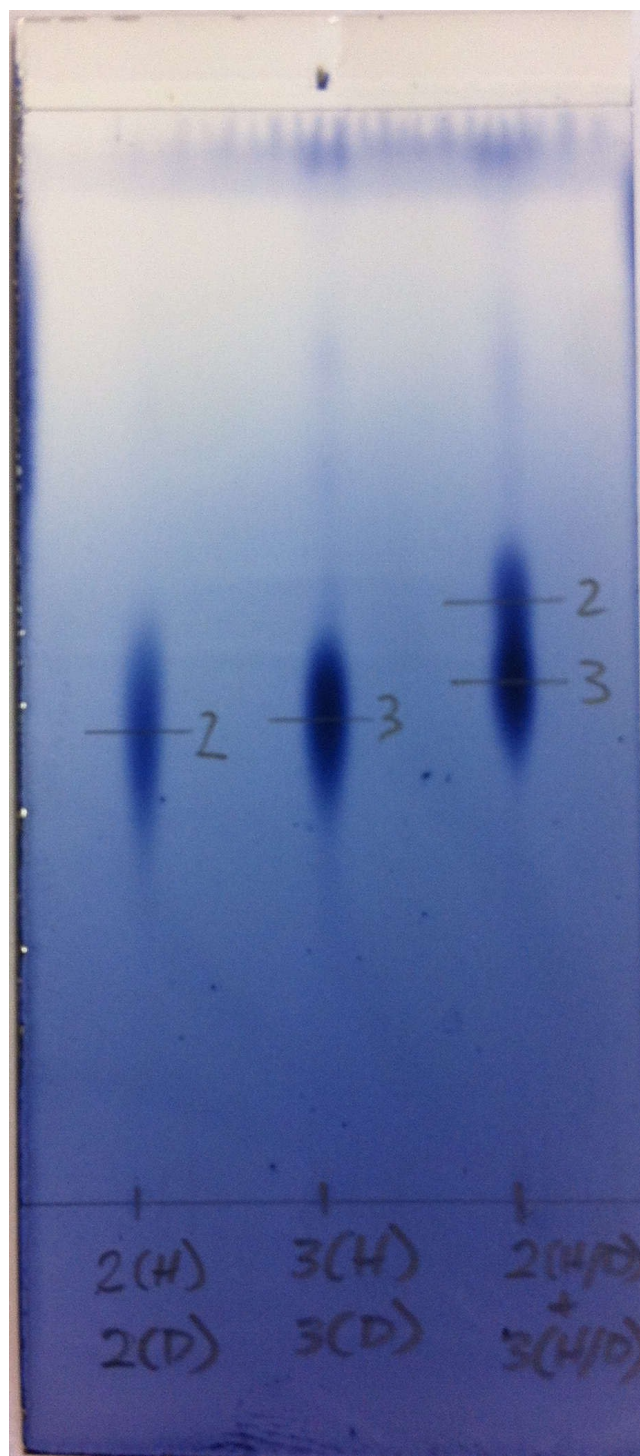

**Supplementary Figure S7.** Thin layer chromatogram of all Gb<sub>3</sub> lipids used in this study. The plate was developed using H<sub>2</sub>O, CH<sub>3</sub>OH and CH<sub>2</sub>Cl<sub>2</sub> (1, 30, 100, v/v/v). After the end of the chromatographic run and careful drying the different compounds were rendered visible by spraying with cerium (IV)/ammonium molybdate solution.



**Supplementary Table S1:** Calculated chain extent  $L_c^*$  in Å for the respective deuterated lipid in lignoceryl-Gb<sub>3</sub>/POPC/PSM/cholesterol (5:40:35:20 mol/mol/mol/mol) membranes. The experimental error of the  $L_c^*$  calculation is ~0.2 Å for Gb<sub>3</sub> and ~0.1 for POPC or PSM.

| Temperature | Gb <sub>3</sub> - <i>d</i> <sub>47</sub> |        | POPC- <i>d</i> <sub>31</sub> |        | PSM- <i>d</i> <sub>31</sub> |        |
|-------------|------------------------------------------|--------|------------------------------|--------|-----------------------------|--------|
| /°C         |                                          | +Shiga |                              | +Shiga |                             | +Shiga |
| 25          | 21.0                                     | 21.0   | 14.1                         | 13.5   | 15.8                        | 15.4   |
| 37          | 19.5                                     | 18.9   | 13.6                         | 13.1   | 15.4                        | 14.6   |
| 45          | 18.9                                     | 18.5   | 13.3                         | 13.0   | 14.9                        | 14.1   |

**Supplementary Table S2:** Mean order parameter for the respective deuterated lipid in lignoceryl-Gb<sub>3</sub>-*d*<sub>47</sub>/POPC/PSM/cholesterol (5:40:35:20 mol/mol/mol/mol) membranes. The typical experimental error on the average order parameter is <0.01.

| Temperature | Gb <sub>3</sub> - <i>d</i> <sub>47</sub> |        | POPC- <i>d</i> <sub>31</sub> |        | PSM- <i>d</i> <sub>31</sub> |        |
|-------------|------------------------------------------|--------|------------------------------|--------|-----------------------------|--------|
| /°C         |                                          | +Shiga |                              | +Shiga |                             | +Shiga |
| 25          | 0.26                                     | 0.27   | 0.26                         | 0.23   | 0.35                        | 0.33   |
| 37          | 0.21                                     | 0.21   | 0.23                         | 0.21   | 0.33                        | 0.28   |
| 45          | 0.20                                     | 0.19   | 0.22                         | 0.21   | 0.30                        | 0.26   |

**Supplementary Table S3:** Calculated chain extent  $L_c^*$  in Å for the respective deuterated lipid in palmitoyl-Gb<sub>3</sub>/POPC/PSM/cholesterol (5:40:35:20 mol/mol/mol/mol) membranes. The experimental error of the  $L_c^*$  calculation is ~0.2 Å for Gb<sub>3</sub> and ~0.1 for POPC or PSM.

| Temperature | Gb <sub>3</sub> - <i>d</i> <sub>31</sub> |        | POPC- <i>d</i> <sub>31</sub> |        | PSM- <i>d</i> <sub>31</sub> |        |
|-------------|------------------------------------------|--------|------------------------------|--------|-----------------------------|--------|
| /°C         |                                          | +Shiga |                              | +Shiga |                             | +Shiga |
| 25          | 16.4                                     | 15.6   | 15.4                         | 12.8   | 16.2                        | 16.3   |
| 37          | 15.3                                     | 15.1   | 15.0                         | 12.9   | 15.6                        | 15.6   |
| 45          | 14.6                                     | 15.0   | 14.9                         | 12.9   | 15.2                        | 14.9   |

**Supplementary Table S4:** Mean order parameter for the respective deuterated lipid in palmitoyl-Gb<sub>3</sub>/POPC/PSM/cholesterol (5:40:35:20 mol/mol/mol/mol) membranes. The typical experimental error on the average order parameter is <0.01.

| Temperature | Gb <sub>3</sub> - <i>d</i> <sub>31</sub> | POPC- <i>d</i> <sub>31</sub> |      | PSM- <i>d</i> <sub>31</sub> |      |
|-------------|------------------------------------------|------------------------------|------|-----------------------------|------|
| /°C         |                                          | +Shiga                       |      | +Shiga                      |      |
| 25          | 0.39                                     | 0.35                         | 0.33 | 0.20                        | 0.38 |
| 37          | 0.32                                     | 0.31                         | 0.31 | 0.20                        | 0.34 |
| 45          | 0.28                                     | 0.29                         | 0.30 | 0.20                        | 0.31 |
